# Supplementary material for: Capability, opportunity, and motivation: an across contexts empirical examination of the COM-B model
Source: PubMed Central journal article supplement (PMC8164288; doi:10.1186/s12889-021-11019-w), 2021-05-29
Supplement: 12889_2021_11019_MOESM1_ESM.pdf [file 12889_2021_11019_MOESM1_ESM.pdf]

**Additional File 1**

*Mapping of COM constructs to TDF domains and associated measures*

|                 |                                          | Physical activity                      |           | Eating                                 |           |
|-----------------|------------------------------------------|----------------------------------------|-----------|----------------------------------------|-----------|
| COM             | TDF domain                               | Measure(s)                             | Source(s) | Measure(s)                             | Source(s) |
| Psychological   | Knowledge                                | Physical activity knowledge            | (1)       | Nutrition knowledge                    | (2)       |
|                 | Skills                                   | Perceived competence                   | (3)       | Perceived competence                   | (4)       |
|                 | Memory, attention and decision processes | Decision making                        | (5)       | Decisional balance                     | (6)       |
|                 | Behavioural regulation                   | Action control                         | (7)       | Action control                         | (7)       |
|                 |                                          |                                        | (8)       | Action planning                        | (8)       |
| Action planning | Habits                                   | (9)                                    | Habits    | (9)                                    |           |
|                 |                                          | (9)                                    |           |                                        |           |
| Physical        | Skills                                   |                                        | -         | -                                      | -         |
| Social          | Social influences                        | Subjective norms                       | (10)      | Subjective norms                       | (10, 12)  |
|                 |                                          | Social support                         | (11)      | Social support                         | (6, 11)   |
| Physical        | Environmental context and resources      | Perceived environment                  | (13)      | Perceived environment                  | (6, 14)   |
| Reflective      | Social/professional role & identity      | Identity                               | (15)      | Identity                               | (16)      |
|                 | Beliefs about capabilities               | Self-efficacy PBC                      | (10)      | Self-efficacy PBC                      | (10, 12)  |
|                 | Optimism                                 | -                                      | -         | -                                      | -         |
|                 | Beliefs about consequences               | Attitudes (instrumental and affective) | (10)      | Attitudes (instrumental and affective) | (10, 12)  |
| Intentions      | Goals                                    | Intentions                             | (10)      | Intentions                             | (10, 12)  |
|                 |                                          | Physical activity goals                | (17)      | Dietary goals                          | (18)      |
| Automatic       | Social/professional role & identity      | -                                      | -         | -                                      | -         |
|                 | Optimism                                 | -                                      | -         | -                                      | -         |
|                 | Reinforcement                            | Reward-based exercise                  | (19)      | Reward-based eating                    | (20)      |
|                 | Emotion                                  | Affect (positive and negative)         | (21)      | Emotional state                        | (22)      |

*Table footnotes.* Objective measurement of physical skills (PA and HE) was not possible; perceived competence was measured as a proxy. A valid measure of optimism (PA and HE) was not sourced. Abbreviations: HE = healthy eating; PA = physical activity; PBC = perceived behavioural control; TDF = theoretical domains framework.

## Sources:

1. Rundle-Thiele, S., Kubacki, K., & Gruneklee, N. (2016). Perceived benefits and barriers of physical activity: A social marketing formative study. *Health Marketing Quarterly*, 33(2), 181-194. <https://doi.org/10.1080/07359683.2016.1166872>
2. Dickson-Spillmann, M., Siegrist, M., & Keller, C. (2011). Development and validation of a short, consumer-oriented nutrition knowledge questionnaire. *Appetite*, 56(3), 617-620. <https://doi.org/10.1016/j.appet.2011.01.034>
3. Fox, K. R., & Corbin, C. B. (1989). The physical activity self-perception profile: Development and preliminary validation. *Journal of Sport & Exercise Psychology*, 11(4), 408-430.
4. van der Horst, K., Brunner, T. A., & Siegrist, M. (2011). Ready-meal consumption: associations with weight status and cooking skills. *Public Health Nutrition*, 14(2), 239-245. <https://doi.org/10.1017/S1368980010002624>
5. Marcus, B. H., Rakowski, W., & Rossi, J. S. (1992). Assessing motivational readiness and decision making for exercise. *Health Psychology*, 11(4), 257-261. <https://doi.org/10.1037/0278-6133.11.4.257>
6. Norman, G. J., Carlson, J. A., Sallis, J. F., Wagner, N., Calfas, K. J., & Patrick, K. (2010). Reliability and validity of brief psychosocial measures related to dietary behaviors. *International Journal of Behavioral Nutrition and Physical Activity*, 7(1), 56-56. <https://doi.org/10.1186/1479-5868-7-56>
7. Luszczynska, A., & Schwarzer, R. (2003). Planning and self-efficacy in the adoption and maintenance of breast self-examination: A longitudinal study on self-regulatory cognitions. *Psychology & Health*, 18(1), 93-108. <https://doi.org/10.1080/0887044021000019358>
8. Sniehotta, F. F., Scholz, U., & Schwarzer, R. (2005). Bridging the intention-behaviour gap: Planning, self-efficacy, and action control in the adoption and maintenance of physical exercise. *Psychology & Health*, 20(2), 143-160. <https://doi.org/10.1080/08870440512331317670>
9. Verplanken, B., & Orbell, S. (2003). Reflections on past behavior: A self-report index of habit strength. *Journal of Applied Social Psychology*, 33(6), 1313-1330. <https://doi.org/10.1111/j.1559-1816.2003.tb01951.x>
10. Rhodes, R. E., & Courneya, K. S. (2003). Investigating multiple components of attitude, subjective norm, and perceived control: An examination of the theory of planned behaviour in the exercise domain. *British Journal of Social Psychology*, 42(1), 129-146. <https://doi.org/10.1348/014466603763276162>
11. Sallis, J. F., Grossman, R. M., Pinski, R. B., Patterson, T. L., & Nader, P. R. (1987). The development of scales to measure social support for diet and exercise behaviors. *Preventive Medicine*, 16(6), 825-836. [https://doi.org/https://doi.org/10.1016/0091-7435\(87\)90022-3](https://doi.org/https://doi.org/10.1016/0091-7435(87)90022-3)
12. Conner, M., Norman, P., & Bell, R. (2002). The theory of planned behavior and healthy eating. *Health Psychology*, 21(2), 194-201. <https://doi.org/10.1037/0278-6133.21.2.194>
13. Echeverria, S. E., Diez-Roux, A. V., & Link, B. G. (2004). Reliability of self-reported neighborhood characteristics. *Journal of Urban Health*, 81(4), 682-701. <https://doi.org/10.1093/jurban/jth151>
14. Dewar, D. L., Lubans, D. R., Plotnikoff, R. C., & Morgan, P. J. (2012). Development and evaluation of social cognitive measures related to adolescent dietary behaviors. *International Journal of Behavioral Nutrition and Physical Activity*, 9(1), 36-36. <https://doi.org/10.1186/1479-5868-9-36>
15. Anderson, D. F., & Cychosz, C. M. (1994). Development of an exercise identity scale. *Perceptual and Motor Skills*, 78(3), 747-751. <https://doi.org/10.1177/003151259407800313>
16. Carfora, V., Caso, D., & Conner, M. (2016). The role of self-identity in predicting fruit and vegetable intake. *Appetite*, 106, 23-29. <https://doi.org/10.1016/j.appet.2015.12.020>
17. Markland, D., & Ingledew, D. K. (1997). The measurement of exercise motives: Factorial validity and invariance across gender of a revised exercise motivations inventory. *British Journal of Health Psychology*, 2(4), 361-376. <https://doi.org/10.1111/j.2044-8287.1997.tb00549.x>
18. Turner-McGrievy, G. M., Wright, J. A., Migneault, J. P., Quintiliani, L., & Friedman, R. H. (2014). The interaction between dietary and life goals: Using goal systems theory to explore healthy diet and life goals. *Health Psychology and Behavioral Medicine*, 2(1), 759-769. <https://doi.org/10.1080/21642850.2014.927737>
19. Marcus, B. H., Rossi, J. S., Selby, V. C., Niaura, R. S., & Abrams, D. B. (1992). The stages and processes of exercise adoption and maintenance in a worksite sample. *Health Psychology*, 11(6), 386-395. <https://doi.org/10.1037/0278-6133.11.6.386>
20. Epel, E. S., Tomiyama, A. J., Mason, A. E., Laraia, B. A., Hartman, W., Ready, K., Acree, M., Adam, T. C., St Jeor, S., & Kessler, D. (2014). The reward-based eating drive scale: A self-report index of reward-based eating. *PLoS ONE*, 9(6), e101350. <https://doi.org/10.1371/journal.pone.0101350>
21. Thompson, E. R. (2007). Development and validation of an internationally reliable short-form of the positive and negative affect schedule (PANAS). *Journal of Cross-Cultural Psychology*, 38(2), 227-242. <https://doi.org/10.1177/0022022106297301>
22. Macht, M., & Simons, G. (2000). Emotions and eating in everyday life. *Appetite*, 35(1), 65-71. <https://doi.org/10.1006/appe.2000.0325>
