# Supplementary material for: Capability, opportunity, and motivation: an across contexts empirical examination of the COM-B model
Source: PubMed Central journal article supplement (PMC8164288; doi:10.1186/s12889-021-11019-w), 2021-05-29
Supplement: 12889_2021_11019_MOESM2_ESM.pdf [file 12889_2021_11019_MOESM2_ESM.pdf]

**Additional File 2**  
*Survey instruments*

| Physical activity survey instrument                                                            |     |                                                                       |                                                                                                                                                                                                     |
|------------------------------------------------------------------------------------------------|-----|-----------------------------------------------------------------------|-----------------------------------------------------------------------------------------------------------------------------------------------------------------------------------------------------|
| Measure                                                                                        | No. | Response format                                                       | Item wording                                                                                                                                                                                        |
| <b>Knowledge</b>                                                                               | 6   | Nominal ‘true or false’ scale                                         | Please indicate whether the following statements are true or false.                                                                                                                                 |
|                                                                                                |     |                                                                       | Adults aged 18 - 64 years should engage in at least 150 minutes of moderate intensity (i.e., exercises requiring some effort, but conversation is still possible) physical activity each week.      |
|                                                                                                |     |                                                                       | Adults aged 18-64 years should engage in at least 75 minutes of vigorous intensity (i.e., exercises which induce heaving breathing) physical activity each week.                                    |
|                                                                                                |     |                                                                       | An equivalent combination of both moderate and vigorous activities each week is sufficient (e.g., 1.5 hrs of moderate intensity + 1 hr of vigorous intensity exercise) for adults aged 18-64 years. |
|                                                                                                |     |                                                                       | Adults aged 18-64 years should do muscle strengthening activities on at least 2 days each week.                                                                                                     |
|                                                                                                |     |                                                                       | 56% of Australian adults aged 18 years and over are either inactive or have low levels of physical activity.                                                                                        |
| <b>Decision Making</b>                                                                         | 16  | 7-point Likert scale ranging from strongly disagree to strongly agree | Regular physical activity can reduce your risk of cardiovascular disease, type 2 diabetes, and some cancers, but only if it is performed at a moderate-vigorous intensity.                          |
|                                                                                                |     |                                                                       | Please read the following statements and indicate your level of agreement when it comes to making the decision of whether to exercise or not.                                                       |
|                                                                                                |     |                                                                       | I would have more energy for my family and friends if I exercised regularly.                                                                                                                        |
|                                                                                                |     |                                                                       | Regular exercise would help me relieve tension.                                                                                                                                                     |
|                                                                                                |     |                                                                       | I would feel more confident if I exercised regularly.                                                                                                                                               |
|                                                                                                |     |                                                                       | I would sleep more soundly if I exercised regularly.                                                                                                                                                |
|                                                                                                |     |                                                                       | I would feel good about myself if I kept my commitment to exercise regularly.                                                                                                                       |
|                                                                                                |     |                                                                       | I would like my body better if I exercised regularly.                                                                                                                                               |
|                                                                                                |     |                                                                       | It would be easier for me to perform routine physical tasks if I exercised regularly.                                                                                                               |
|                                                                                                |     |                                                                       | I will feel less stressed if I exercise regularly.                                                                                                                                                  |
|                                                                                                |     |                                                                       | I would be more comfortable with my body if I exercised regularly.                                                                                                                                  |
|                                                                                                |     |                                                                       | Regular exercise would help me have a more positive outlook on life.                                                                                                                                |
|                                                                                                |     |                                                                       | I think I would be too tired to do my daily work after exercising.                                                                                                                                  |
|                                                                                                |     |                                                                       | I would find it difficult to find an exercise activity that I enjoy that is not affected by bad weather.                                                                                            |
| I feel uncomfortable when I exercise because I get out of breath and my heart beats very fast. |     |                                                                       |                                                                                                                                                                                                     |

An Across Contexts Empirical Examination of the COM-B Model (Willmott et al., 2021)

| Physical activity survey instrument |     |                                                                       |                                                                                                                                                                          |
|-------------------------------------|-----|-----------------------------------------------------------------------|--------------------------------------------------------------------------------------------------------------------------------------------------------------------------|
| Measure                             | No. | Response format                                                       | Item wording                                                                                                                                                             |
|                                     |     |                                                                       | Regular exercise would take too much of my time.                                                                                                                         |
|                                     |     |                                                                       | I would have less time for my family and friends if I exercised regularly.                                                                                               |
|                                     |     |                                                                       | At the end of the day, I am too exhausted to exercise.                                                                                                                   |
| <b>Action Control</b>               | 6   | 7-point Likert scale ranging from very untrue to very true            | Think about the last four weeks and indicate your level of agreement with the following statements. During the last four weeks I have...                                 |
|                                     |     |                                                                       | Constantly monitored whether I exercise frequently enough.                                                                                                               |
|                                     |     |                                                                       | Watched carefully that I exercise for at least 30 minutes at a moderate-intense level.                                                                                   |
|                                     |     |                                                                       | I have had my exercise intention often on my mind.                                                                                                                       |
|                                     |     |                                                                       | I have always been aware of my planned exercise regime.                                                                                                                  |
|                                     |     |                                                                       | I have really tried to exercise regularly.                                                                                                                               |
|                                     |     |                                                                       | Tried my best to act in accordance with my standards (for exercise).                                                                                                     |
| <b>Action Planning</b>              | 4   | 7-point Likert scale ranging from very untrue to very true            | Think about the last four weeks and indicate your level of agreement with the following statements. During the last four weeks I have made a detail planned regarding... |
|                                     |     |                                                                       | When to do my physical exercise.                                                                                                                                         |
|                                     |     |                                                                       | Where to exercise.                                                                                                                                                       |
|                                     |     |                                                                       | How to do my physical exercise.                                                                                                                                          |
|                                     |     |                                                                       | How often to do my physical exercise.                                                                                                                                    |
| <b>Habit</b>                        | 12  | 7-point Likert scale ranging from strongly disagree to strongly agree | Please indicate your level of agreement with the following statements. Physical activity is something...                                                                 |
|                                     |     |                                                                       | I do frequently.                                                                                                                                                         |
|                                     |     |                                                                       | I do automatically.                                                                                                                                                      |
|                                     |     |                                                                       | I do without having to consciously remember.                                                                                                                             |
|                                     |     |                                                                       | That makes me feel weird if I do not do it.                                                                                                                              |
|                                     |     |                                                                       | I do without thinking.                                                                                                                                                   |
|                                     |     |                                                                       | That would require effort not to do it.                                                                                                                                  |
|                                     |     |                                                                       | That belongs to my (daily, weekly, monthly) routine.                                                                                                                     |
|                                     |     |                                                                       | I start doing before I realise, I'm doing it.                                                                                                                            |
|                                     |     |                                                                       | I would find hard not to do.                                                                                                                                             |
|                                     |     |                                                                       | I have no need to think about doing.                                                                                                                                     |

An Across Contexts Empirical Examination of the COM-B Model (Willmott et al., 2021)

| Physical activity survey instrument |     |                                                                       |                                                                                                               |
|-------------------------------------|-----|-----------------------------------------------------------------------|---------------------------------------------------------------------------------------------------------------|
| Measure                             | No. | Response format                                                       | Item wording                                                                                                  |
|                                     |     |                                                                       | That's typically "me."                                                                                        |
|                                     |     |                                                                       | I have been doing for a long time.                                                                            |
| <b>Skills/Competence</b>            | 6   | 7-point Likert scale ranging from very untrue to very true            | Please indicate which of the following statements most describes you.                                         |
|                                     |     |                                                                       | I do very well at all kinds of physical activities. [Reverse coded]                                           |
|                                     |     |                                                                       | I wish I could be a lot better at physical activities.                                                        |
|                                     |     |                                                                       | I think I could do well at just about any new physical activity I haven't tried before. [Reverse coded]       |
|                                     |     |                                                                       | In physical activities I usually watch instead of participating.                                              |
|                                     |     |                                                                       | I feel that others my age are generally better than me at physical activities.                                |
|                                     |     |                                                                       | I don't feel I can do well at new physical activities.                                                        |
| <b>Environment</b>                  | 11  | 5-point Likert scale ranging from strongly disagree to strongly agree | Please read the following statements and indicate your level of agreement.                                    |
|                                     |     |                                                                       | My neighbourhood offers many opportunities to be physically active.                                           |
|                                     |     |                                                                       | Local sports clubs and other similar providers in my neighbourhood offer many opportunities to get exercise.  |
|                                     |     |                                                                       | It is pleasant to walk in my neighbourhood.                                                                   |
|                                     |     |                                                                       | There are enough trees in my neighbourhood to provide shade.                                                  |
|                                     |     |                                                                       | My neighbourhood has heavy traffic. [Reverse coded]                                                           |
|                                     |     |                                                                       | There are busy roads to cross when out for walks in my neighbourhood. [Reverse coded]                         |
|                                     |     |                                                                       | In my neighbourhood it is easy to walk to places.                                                             |
|                                     |     |                                                                       | There are stores within walking distance of my home.                                                          |
|                                     |     |                                                                       | In my neighbourhood, the streets and sidewalk are in good condition.                                          |
|                                     |     |                                                                       | I often see other people walking in my neighbourhood.                                                         |
|                                     |     |                                                                       | I often see other people exercising (e.g., jogging, cycling, playing sports) in my neighbourhood.             |
| <b>Resources</b>                    | 8   | Nominal 'yes or no' scale                                             | Please indicate if there are any of the following facilities within a 20-minute walk from your neighbourhood. |
|                                     |     |                                                                       | Public park.                                                                                                  |
|                                     |     |                                                                       | Public (or private) sports field, basketball court, or tennis court.                                          |
|                                     |     |                                                                       | Public (or private) pool or beach.                                                                            |

An Across Contexts Empirical Examination of the COM-B Model (Willmott et al., 2021)

| Physical activity survey instrument |     |                                                                       |                                                                                                            |
|-------------------------------------|-----|-----------------------------------------------------------------------|------------------------------------------------------------------------------------------------------------|
| Measure                             | No. | Response format                                                       | Item wording                                                                                               |
|                                     |     |                                                                       | Schools, colleges, or community centres with recreational facilities that are free and open to the public. |
|                                     |     |                                                                       | Gyms, health/fitness clubs, or pools that you must join and pay for.                                       |
|                                     |     |                                                                       | PCYC, YMCA, YWCAs, or similar facilities.                                                                  |
|                                     |     |                                                                       | Bicycle path in the street or park.                                                                        |
|                                     |     |                                                                       | Sidewalks.                                                                                                 |
| <b>Subjective Norms</b>             | 5   | 7-point Likert scale ranging from strongly disagree to strongly agree | Please read the following statements and indicate your level of agreement.                                 |
|                                     |     |                                                                       | Most people in my social network want me to exercise regularly in the next 2 weeks.                        |
|                                     |     |                                                                       | Most people in my social network would approve if I exercised regularly in the next 2 weeks.               |
|                                     |     |                                                                       | Most of my friends exercise regularly,                                                                     |
|                                     |     |                                                                       | Most of my family members exercise regularly.                                                              |
|                                     |     |                                                                       | Most of my co-workers exercise regularly.                                                                  |
| <b>Social Support</b>               | 13  | 7-point Likert scale ranging from never to always                     | During the past 12 months, how often have your family, friends, and experts...                             |
|                                     |     |                                                                       | Exercised with me.                                                                                         |
|                                     |     |                                                                       | Offered to exercise with me.                                                                               |
|                                     |     |                                                                       | Gave me helpful reminders to exercise (“Are you going to exercise tonight?”).                              |
|                                     |     |                                                                       | Gave me encouragement to stick with my exercise program.                                                   |
|                                     |     |                                                                       | Changed their schedule so we could exercise together.                                                      |
|                                     |     |                                                                       | Discussed exercise with me.                                                                                |
|                                     |     |                                                                       | Complained about the time I spend exercising. [Reverse coded]                                              |
|                                     |     |                                                                       | Criticised me or made fun of me for exercising. [Reverse coded]                                            |
|                                     |     |                                                                       | Gave me rewards for exercising (bought me something or gave me something I like).                          |
|                                     |     |                                                                       | Planned for exercise on recreational outings                                                               |
|                                     |     |                                                                       | Helped plan activities around my exercise.                                                                 |
|                                     |     |                                                                       | Asked me for ideas on how they can get more exercise.                                                      |
|                                     |     |                                                                       | Talked about how much they like to exercise.                                                               |
| <b>Self-Efficacy</b>                | 3   | 7-point Likert scales*                                                | Please read the following statements and indicate your level of confidence or agreement.                   |

**An Across Contexts Empirical Examination of the COM-B Model (Willmott et al., 2021)**

| Physical activity survey instrument |     |                                                              |                                                                                                                           |
|-------------------------------------|-----|--------------------------------------------------------------|---------------------------------------------------------------------------------------------------------------------------|
| Measure                             | No. | Response format                                              | Item wording                                                                                                              |
|                                     |     | *Very unconfident to very confident                          | How confident are you that you will be able to exercise regularly in the next 2 weeks?                                    |
|                                     |     | *Very unconfident to very confident                          | How confident are you over the next 2 weeks that you could overcome obstacles that prevent you from exercising regularly? |
|                                     |     | *Very untrue to very true                                    | I believe I have the ability to regularly exercise in the next 2 weeks.                                                   |
| <b>PBC</b>                          | 3   | 7-point Likert scales*                                       | Please read the following statement and indicate the level of agreement or control you feel.                              |
|                                     |     | *Strongly disagree to strongly agree                         | Whether or not I exercise regularly in the next 2 weeks is entirely up to me.                                             |
|                                     |     | *No control to complete control                              | How much personal control do you feel you have over exercising regularly in the next 2 weeks?                             |
|                                     |     | *Completely beyond my control to very much within my control | How much do you feel that exercising regularly in the next 2 weeks is within your control?                                |
| <b>Attitudes</b>                    | 6   | 7-point semantic differential scale                          | For me, exercising regularly over the next 2 weeks would be...                                                            |
|                                     |     |                                                              | Harmful   Beneficial                                                                                                      |
|                                     |     |                                                              | Useless   Useful                                                                                                          |
|                                     |     |                                                              | Foolish   Wise                                                                                                            |
|                                     |     |                                                              | Boring   Interesting                                                                                                      |
|                                     |     |                                                              | Unenjoyable   Enjoyable                                                                                                   |
|                                     |     |                                                              | Stressful   Relaxing                                                                                                      |
| <b>Goals</b>                        | 12  | 7-point Likert scale ranging from very untrue to very true   | Personally, I exercise (or might exercise) ...                                                                            |
|                                     |     |                                                              | To spend time with friends.                                                                                               |
|                                     |     |                                                              | To enjoy the social aspects of exercising.                                                                                |
|                                     |     |                                                              | To have fun being active with other people.                                                                               |
|                                     |     |                                                              | To make new friends.                                                                                                      |
|                                     |     |                                                              | To help me look younger.                                                                                                  |
|                                     |     |                                                              | To have a good body.                                                                                                      |
|                                     |     |                                                              | To improve my appearance.                                                                                                 |
|                                     |     |                                                              | To look more attractive.                                                                                                  |
|                                     |     |                                                              | To give me goals to work towards.                                                                                         |
|                                     |     |                                                              | To give me personal challenges to face.                                                                                   |
|                                     |     |                                                              | To develop personal skills.                                                                                               |

**An Across Contexts Empirical Examination of the COM-B Model (Willmott et al., 2021)**

| Physical activity survey instrument                              |     |                                                                       |                                                                                                                                                                                                      |
|------------------------------------------------------------------|-----|-----------------------------------------------------------------------|------------------------------------------------------------------------------------------------------------------------------------------------------------------------------------------------------|
| Measure                                                          | No. | Response format                                                       | Item wording                                                                                                                                                                                         |
| <b>Intentions</b>                                                | 3   | 7-point Likert scale ranging from strongly disagree to strongly agree | To measure myself against personal standards.                                                                                                                                                        |
|                                                                  |     |                                                                       | Over the next three months I...                                                                                                                                                                      |
|                                                                  |     |                                                                       | Intend to engage in at least 30 minutes of moderate intensity physical activity, five times per week.                                                                                                |
| <b>Identity</b>                                                  | 9   | 7-point Likert scale ranging from strongly disagree to strongly agree | Determined to engage in at least 30 minutes of moderate intensity physical activity, five times per week.                                                                                            |
|                                                                  |     |                                                                       | Plan to engage in at least 30 minutes of moderate intensity physical activity, five times per week.                                                                                                  |
|                                                                  |     |                                                                       | The following questions concern your personal beliefs about exercise. Please indicate the degree to which you agree or disagree with each statement when thinking about your exercise participation. |
|                                                                  |     |                                                                       | I consider myself an exerciser.                                                                                                                                                                      |
|                                                                  |     |                                                                       | When I describe myself to others, I usually include my involvement in exercise.                                                                                                                      |
|                                                                  |     |                                                                       | I have numerous goals related to exercising.                                                                                                                                                         |
|                                                                  |     |                                                                       | Physical exercise is a central factor to my self-concept.                                                                                                                                            |
|                                                                  |     |                                                                       | I need to exercise to feel good about myself.                                                                                                                                                        |
|                                                                  |     |                                                                       | Others see me as someone who exercises regularly.                                                                                                                                                    |
|                                                                  |     |                                                                       | For me, being an exerciser means more than just exercising.                                                                                                                                          |
| I would feel a real loss if I were forced to give up exercising. |     |                                                                       |                                                                                                                                                                                                      |
| <b>Affect/Emotions</b>                                           | 10  | 5-point Likert scale ranging from never to always                     | Exercising is something I think about often.                                                                                                                                                         |
|                                                                  |     |                                                                       | Thinking about yourself and how you normally feel, to what extent do you generally feel the following emotions about physical activity.                                                              |
|                                                                  |     |                                                                       | Determined.                                                                                                                                                                                          |
|                                                                  |     |                                                                       | Attentive.                                                                                                                                                                                           |
|                                                                  |     |                                                                       | Alert.                                                                                                                                                                                               |
|                                                                  |     |                                                                       | Inspired.                                                                                                                                                                                            |
|                                                                  |     |                                                                       | Active.                                                                                                                                                                                              |
|                                                                  |     |                                                                       | Afraid.                                                                                                                                                                                              |
|                                                                  |     |                                                                       | Nervous.                                                                                                                                                                                             |
|                                                                  |     |                                                                       | Upset.                                                                                                                                                                                               |
| Ashamed.                                                         |     |                                                                       |                                                                                                                                                                                                      |

An Across Contexts Empirical Examination of the COM-B Model (Willmott et al., 2021)

|                            |                                                                           |                                                   | Physical activity survey instrument                                                                      |                                                                                                                                                                                              |
|----------------------------|---------------------------------------------------------------------------|---------------------------------------------------|----------------------------------------------------------------------------------------------------------|----------------------------------------------------------------------------------------------------------------------------------------------------------------------------------------------|
| Measure                    | No.                                                                       | Response format                                   | Item wording                                                                                             |                                                                                                                                                                                              |
| <b>Reinforcement</b>       | 4                                                                         | 5-point Likert scale ranging from never to always | Hostile.                                                                                                 |                                                                                                                                                                                              |
|                            |                                                                           |                                                   | Please indicate how often you do the following after exercising.                                         |                                                                                                                                                                                              |
|                            |                                                                           |                                                   | I reward myself when I exercise.                                                                         |                                                                                                                                                                                              |
|                            |                                                                           |                                                   | I try to set realistic goals for myself rather than setting myself up for failure by expecting too much. |                                                                                                                                                                                              |
| <b>Behaviour (IPAQ-SF)</b> | 7                                                                         | Ratio and nominal scales                          | When I exercise, I tell myself that I am being good to myself by taking care of my body in this way.     |                                                                                                                                                                                              |
|                            |                                                                           |                                                   | I do something nice for myself for making efforts to exercise more.                                      |                                                                                                                                                                                              |
|                            |                                                                           |                                                   | Days per week                                                                                            | During the last 7 days, on how many days did you do <b>vigorous</b> physical activities like heavy lifting, digging, aerobics, or fast bicycling?                                            |
|                            |                                                                           |                                                   | Hours and minutes per day                                                                                | How much time did you usually spend doing vigorous physical activities on one of those days?                                                                                                 |
|                            |                                                                           |                                                   | Days per week                                                                                            | During the last 7 days, on how many days did you do <b>moderate</b> physical activities like carrying light loads, bicycling at a regular pace, or doubles tennis? Does not include walking. |
|                            |                                                                           |                                                   | Hours and minutes per day                                                                                | How much time did you usually spend doing moderate physical activities on one of those days?                                                                                                 |
|                            |                                                                           |                                                   | Days per week                                                                                            | During the last 7 days, on how many days did you walk for at least 10 minutes at a time?                                                                                                     |
|                            |                                                                           |                                                   | Hours and minutes per day                                                                                | How much did you usually spend walking on one of those days?                                                                                                                                 |
| Hours and minutes per day  | During the last 7 days, how much time did you spend sitting on a weekday? |                                                   |                                                                                                          |                                                                                                                                                                                              |

*Note.* See Additional File 1 for measure sources. Abbreviations: IPAQ = International Physical Activity Questionnaire – Short Form; PBC = perceived behavioural control.

An Across Contexts Empirical Examination of the COM-B Model (Willmott et al., 2021)

| Eating survey instrument |     |                                                                       |                                                                                                                                          |
|--------------------------|-----|-----------------------------------------------------------------------|------------------------------------------------------------------------------------------------------------------------------------------|
| Measure                  | No. | Response format                                                       | Item wording                                                                                                                             |
| <b>Knowledge</b>         | 8   | Nominal 'true or false' scale                                         | Please indicate whether you believe the following statements are true or false.                                                          |
|                          |     |                                                                       | A balanced diet implies eating all foods in the same amounts.                                                                            |
|                          |     |                                                                       | The health benefit of fruit and vegetables lies alone in the supply of vitamins and minerals.                                            |
|                          |     |                                                                       | The same amount of beef steak and chicken breast contains equally as many calories.                                                      |
|                          |     |                                                                       | The same amount of sugar and fat contains equally as many calories.                                                                      |
|                          |     |                                                                       | Fat is always bad for your health.                                                                                                       |
|                          |     |                                                                       | To eat healthily, you should eat less fat.                                                                                               |
|                          |     |                                                                       | A healthy meal should consist of half meat, a quarter vegetable, and a quarter side dishes.                                              |
| <b>Decision Making</b>   | 15  | 7-point Likert scale ranging from strongly disagree to strongly agree | For a healthy nutrition, dairy products should be consumed in the same amounts as fruit and vegetables.                                  |
|                          |     |                                                                       | Please read the following statements carefully and indicate your level of agreement with each.                                           |
|                          |     |                                                                       | I would have more energy if I ate healthily.                                                                                             |
|                          |     |                                                                       | I would be doing something good for my body if I ate healthily.                                                                          |
|                          |     |                                                                       | I would 'feel' good if I ate healthily.                                                                                                  |
|                          |     |                                                                       | Eating healthily would help me manage my weight.                                                                                         |
|                          |     |                                                                       | I enjoy the taste of healthy foods.                                                                                                      |
|                          |     |                                                                       | It takes too much time to prepare healthy foods.                                                                                         |
|                          |     |                                                                       | I would rather eat sweets or high fat snacks than healthy foods.                                                                         |
|                          |     |                                                                       | Healthy foods do not satisfy my hunger for very long.                                                                                    |
| <b>Action Control</b>    | 6   | 7-point Likert scale ranging from strongly disagree to strongly agree | Healthy foods are too expensive.                                                                                                         |
|                          |     |                                                                       | I don't like the taste of healthy foods.                                                                                                 |
|                          |     |                                                                       | Think about the last four weeks and indicate your level of agreement with the following statements. During the last four weeks I have... |
|                          |     |                                                                       | Constantly monitored whether I am eating a healthy diet.                                                                                 |
|                          |     |                                                                       | Watched carefully that I eat the recommended 2 servings of fruit and 5 servings of vegetables each day.                                  |
|                          |     |                                                                       | Had my healthy eating intention on my mind.                                                                                              |



An Across Contexts Empirical Examination of the COM-B Model (Willmott et al., 2021)

| Eating survey instrument             |     |                                                                       |                                                                                                                                                                                       |
|--------------------------------------|-----|-----------------------------------------------------------------------|---------------------------------------------------------------------------------------------------------------------------------------------------------------------------------------|
| Measure                              | No. | Response format                                                       | Item wording                                                                                                                                                                          |
| <b>Action Planning</b>               | 4   | 7-point Likert scale ranging from very untrue to very true            | Always been aware of my plan to eat a healthy diet.                                                                                                                                   |
|                                      |     |                                                                       | Really tried to eat healthily on most days of the week.                                                                                                                               |
|                                      |     |                                                                       | Tried my best to act in accordance with my standards (in relation to eating healthily).                                                                                               |
|                                      |     |                                                                       | Think about the last four weeks and indicate the level to which the following statements are untrue/true for you. During the last four weeks I have made a detailed plan regarding... |
| <b>Habit</b>                         | 12  | 7-point Likert scale ranging from strongly disagree to strongly agree | When to do my healthy meal preparations for the week.                                                                                                                                 |
|                                      |     |                                                                       | Where to shop for my healthy meal preparations.                                                                                                                                       |
|                                      |     |                                                                       | How I will approach my meal preparation for the week (e.g., cookbook, download recipes from online website, download an app etc.).                                                    |
|                                      |     |                                                                       | How often to do my meal preparations (e.g., cook meals for next 2-3 days only OR cook and freeze pre-made meals for the entire week).                                                 |
|                                      |     |                                                                       | Please indicate your level of agreement with the following statements. Healthy eating is something...                                                                                 |
|                                      |     |                                                                       | I do frequently.                                                                                                                                                                      |
|                                      |     |                                                                       | I do automatically.                                                                                                                                                                   |
|                                      |     |                                                                       | I do without having to consciously remember.                                                                                                                                          |
|                                      |     |                                                                       | that makes me feel guilty if I do not do it.                                                                                                                                          |
|                                      |     |                                                                       | I do without thinking.                                                                                                                                                                |
|                                      |     |                                                                       | I find effortless to do (e.g., not eating healthy would require more effort than eating healthy for you).                                                                             |
|                                      |     |                                                                       | that belongs to my (daily, weekly, monthly) routine (e.g., you eat a healthy diet every day).                                                                                         |
| that requires little thought.        |     |                                                                       |                                                                                                                                                                                       |
| I would find hard not to do.         |     |                                                                       |                                                                                                                                                                                       |
| I have no need to think about doing. |     |                                                                       |                                                                                                                                                                                       |
| That's typically "me."               |     |                                                                       |                                                                                                                                                                                       |
| I have been doing for a long time.   |     |                                                                       |                                                                                                                                                                                       |
| <b>Skills/Competence</b>             | 7   | 7-point Likert scale ranging from strongly disagree to strongly agree | Please indicate which of the following statements most describes you.                                                                                                                 |

An Across Contexts Empirical Examination of the COM-B Model (Willmott et al., 2021)

| Eating survey instrument |     |                                                                       |                                                                                             |
|--------------------------|-----|-----------------------------------------------------------------------|---------------------------------------------------------------------------------------------|
| Measure                  | No. | Response format                                                       | Item wording                                                                                |
|                          |     |                                                                       | I can cook complicated multi-course meals.                                                  |
|                          |     |                                                                       | I can prepare a lot of meals even without a recipe.                                         |
|                          |     |                                                                       | I can prepare gratin (basic culinary technique - potato topped with a browned crust).       |
|                          |     |                                                                       | I can prepare a soup.                                                                       |
|                          |     |                                                                       | I can prepare a sauce.                                                                      |
|                          |     |                                                                       | I can bake a cake.                                                                          |
|                          |     |                                                                       | I can bake bread.                                                                           |
| <b>Environment</b>       | 10  | 7-point Likert scale ranging from strongly disagree to strongly agree | Please indicate your level of agreement with the following statements.                      |
|                          |     |                                                                       | At work there is a wide variety of healthy food options to choose from.                     |
|                          |     |                                                                       | At work there is a wide variety of healthy drink options to choose from.                    |
|                          |     |                                                                       | At work there is at least one option where I have healthy selections to choose from.        |
|                          |     |                                                                       | There is a wide variety of fresh fruits and vegetables where I shop.                        |
|                          |     |                                                                       | The fruits and vegetables where I shop are at good prices.                                  |
|                          |     |                                                                       | The fruits and vegetables where I shop are of good quality.                                 |
|                          |     |                                                                       | At home there are healthy snacks available to eat.                                          |
|                          |     |                                                                       | At home there are healthy drinks available.                                                 |
|                          |     |                                                                       | At home fruit is always available to eat.                                                   |
|                          |     |                                                                       | At home vegetables are always available to eat.                                             |
| <b>Subjective Norms</b>  | 6   | 7-point Likert scale ranging from strongly disagree to strongly agree | Please read the following statements carefully and indicate your level of agreement.        |
|                          |     |                                                                       | Most people in my social network think I should eat a healthy diet in the next 2 weeks.     |
|                          |     |                                                                       | Most people in my social network want me to eat a healthy diet in the next 2 weeks.         |
|                          |     |                                                                       | Most people in my social network would approve if I ate a healthy diet in the next 2 weeks. |
|                          |     |                                                                       | Most of my friends eat a healthy diet.                                                      |
|                          |     |                                                                       | Most of my family eat a healthy diet.                                                       |
|                          |     |                                                                       | Most of my co-workers eat a healthy diet.                                                   |

An Across Contexts Empirical Examination of the COM-B Model (Willmott et al., 2021)

| Eating survey instrument |     |                                                                 |                                                                                                               |
|--------------------------|-----|-----------------------------------------------------------------|---------------------------------------------------------------------------------------------------------------|
| Measure                  | No. | Response format                                                 | Item wording                                                                                                  |
| <b>Social Support</b>    | 10  | 5-point Likert scale ranging from almost never to almost always | How often in the past month (30 days) has your family or friends done the following?                          |
|                          |     |                                                                 | Encouraged you to eat healthy foods.                                                                          |
|                          |     |                                                                 | Discussed the benefits of eating healthy foods with you.                                                      |
|                          |     |                                                                 | Reminded you to eat healthy foods.                                                                            |
|                          |     |                                                                 | Complimented you on your healthy eating habits.                                                               |
|                          |     |                                                                 | Commented if you went back to old “unhealthy” eating habits.                                                  |
|                          |     |                                                                 | Ate unhealthy foods in front of you.                                                                          |
|                          |     |                                                                 | Refused to eat healthy foods with you.                                                                        |
|                          |     |                                                                 | Brought home foods you were trying not to eat.                                                                |
|                          |     |                                                                 | Complained about eating healthy foods.                                                                        |
| <b>Self-Efficacy</b>     | 3   | 7-point Likert scales*                                          | Offered me food I’m trying not to eat.                                                                        |
|                          |     |                                                                 | Please read the following statements and indicate your level of confidence, difficulty, or perceived ability. |
|                          |     |                                                                 | *Very unconfident to very confident                                                                           |
|                          |     |                                                                 | *Very difficult to very easy                                                                                  |
| <b>PBC</b>               | 3   | 7-point Likert scales*                                          | *Very untrue to very true                                                                                     |
|                          |     |                                                                 | I believe I have the ability to eat healthily in the next 2 weeks.                                            |
|                          |     |                                                                 | Please read the following statement and indicate your level of agreement.                                     |
|                          |     |                                                                 | *Strongly disagree to strongly agree                                                                          |
|                          |     |                                                                 | Whether or not I eat healthily in the next 2 weeks is entirely up to me.                                      |
|                          |     |                                                                 | *No control to complete control                                                                               |
|                          |     |                                                                 | How much control do you feel you have overeating healthily in the next 2 weeks?                               |
|                          |     |                                                                 | *Completely beyond my control to very much within my control                                                  |
|                          |     |                                                                 | How much do you feel that eating healthily in the next 2 weeks is within your control?                        |
| <b>Attitudes</b>         | 6   | 7-point semantic differential scale                             | For me, eating a healthy diet over the next 2 weeks would be...                                               |
|                          |     |                                                                 | Good   Bad                                                                                                    |
|                          |     |                                                                 | Harmful   Beneficial                                                                                          |
|                          |     |                                                                 | Foolish   Wise                                                                                                |
|                          |     |                                                                 | Unenjoyable   Enjoyable                                                                                       |
|                          |     |                                                                 | Unpleasant   Pleasant                                                                                         |
|                          |     |                                                                 | Stressful   Relaxing                                                                                          |

An Across Contexts Empirical Examination of the COM-B Model (Willmott et al., 2021)

| Eating survey instrument                                                      |     |                                                                                     |                                                                                            |
|-------------------------------------------------------------------------------|-----|-------------------------------------------------------------------------------------|--------------------------------------------------------------------------------------------|
| Measure                                                                       | No. | Response format                                                                     | Item wording                                                                               |
| <b>Goals</b>                                                                  | 10  | 7-point Likert scale ranging from very untrue to very true                          | In the past month, how often have you set a goal to...                                     |
|                                                                               |     |                                                                                     | Eat more fruits.                                                                           |
|                                                                               |     |                                                                                     | Eat more vegetables.                                                                       |
|                                                                               |     |                                                                                     | Eat less sweets.                                                                           |
|                                                                               |     |                                                                                     | Eat fewer fast food/take-out.                                                              |
|                                                                               |     |                                                                                     | Drink more water.                                                                          |
|                                                                               |     |                                                                                     | Drink less sugar-sweetened drinks.                                                         |
|                                                                               |     |                                                                                     | Drink less caffeine.                                                                       |
|                                                                               |     |                                                                                     | Drink less alcohol (e.g., beer, wine, hard liquor).                                        |
|                                                                               |     |                                                                                     | Eat a balanced diet.                                                                       |
| Maintain healthy changes that you have already made to your diet.             |     |                                                                                     |                                                                                            |
| <b>Intentions</b>                                                             | 5   | 7-point Likert scale ranging from strongly disagree to strongly agree               | Over the next three months I...                                                            |
|                                                                               |     |                                                                                     | Intend to eat a healthy diet.                                                              |
|                                                                               |     |                                                                                     | Will try to eat a healthy diet.                                                            |
|                                                                               |     |                                                                                     | Want to eat a healthy diet.                                                                |
|                                                                               |     |                                                                                     | Expect to eat a healthy diet.                                                              |
| How likely is it that you will eat a healthy diet over the next three months? |     |                                                                                     |                                                                                            |
| <b>Identity</b>                                                               | 9   | 7-point Likert scale ranging from strongly disagree to strongly agree               | Please indicate your level of agreement with the following statements.                     |
|                                                                               |     |                                                                                     | I think of myself as a healthy eater.                                                      |
|                                                                               |     |                                                                                     | I think of myself as a person who is interested in eating healthy.                         |
|                                                                               |     |                                                                                     | I think of myself as someone who is concerned about the health consequences of what I eat. |
| <b>Affect/Emotions</b>                                                        | 10  | 5-point Likert scale ranging from not at all associated to very strongly associated | Please indicate the extent to which you associate the following emotions with eating.      |
|                                                                               |     |                                                                                     | Feeling of anger (e.g., angry/annoyed).                                                    |
|                                                                               |     |                                                                                     | Feeling of fear (e.g., anxious/fearful).                                                   |
|                                                                               |     |                                                                                     | Feeling of sadness (e.g., sad/depressed).                                                  |

An Across Contexts Empirical Examination of the COM-B Model (Willmott et al., 2021)

| Eating survey instrument |     |                                                                       |                                                                                                 |
|--------------------------|-----|-----------------------------------------------------------------------|-------------------------------------------------------------------------------------------------|
| Measure                  | No. | Response format                                                       | Item wording                                                                                    |
|                          |     |                                                                       | Feeling of joy (e.g., joyful/happy).                                                            |
|                          |     |                                                                       | Feeling of tension (e.g., tense/excited).                                                       |
|                          |     |                                                                       | Feeling of relaxation (e.g., at ease/relaxed).                                                  |
| <b>Motivation</b>        | 10  | 7-point Likert scale ranging from very untrue to very true            | Please indicate the extent to which the following statements are true for you.                  |
|                          |     |                                                                       | I eat when I have feelings of hunger.                                                           |
|                          |     |                                                                       | I eat when I have a desire to eat.                                                              |
|                          |     |                                                                       | I eat when I have bodily symptoms of hunger (e.g., empty feeling in stomach, stomach rumbling). |
|                          |     |                                                                       | I have a tendency to eat irregularly.                                                           |
|                          |     |                                                                       | I have a tendency to eat sweet food (e.g., chocolate).                                          |
|                          |     |                                                                       | I have a tendency to eat good tasting food.                                                     |
|                          |     |                                                                       | I have a tendency to enjoy food.                                                                |
|                          |     |                                                                       | I have a tendency to eat to provide distraction.                                                |
|                          |     |                                                                       | I have a tendency to eat something to relax.                                                    |
|                          |     |                                                                       | I have a tendency to eat to feel better.                                                        |
| <b>Reinforcement</b>     | 9   | 7-point Likert scale ranging from strongly disagree to strongly agree | Please indicate how often you do the following after exercising.                                |
|                          |     |                                                                       | I feel out of control in the presence of delicious food.                                        |
|                          |     |                                                                       | When I start eating, I just can't seem to stop.                                                 |
|                          |     |                                                                       | It is difficult for me to leave food on my plate.                                               |
|                          |     |                                                                       | When it comes to foods I love, I have no willpower.                                             |
|                          |     |                                                                       | I get so hungry that my stomach often seems like a bottomless pit.                              |
|                          |     |                                                                       | I don't get full easily.                                                                        |
|                          |     |                                                                       | It seems like most of my waking hours are preoccupied by thoughts about eating or not eating.   |
|                          |     |                                                                       | I have days when I can't seem to think about anything else but food.                            |
|                          |     |                                                                       | Food is always on my mind.                                                                      |
| <b>Behaviour</b>         | 12  | Nominal, interval, and ratio scales.                                  |                                                                                                 |

**An Across Contexts Empirical Examination of the COM-B Model (Willmott et al., 2021)**

| Eating survey instrument |     |                                                                                                                                                                       |                                                                                                                                               |
|--------------------------|-----|-----------------------------------------------------------------------------------------------------------------------------------------------------------------------|-----------------------------------------------------------------------------------------------------------------------------------------------|
| Measure                  | No. | Response format                                                                                                                                                       | Item wording                                                                                                                                  |
|                          |     | 11-point scale ranging from never to > 10 serves                                                                                                                      | How many serves of vegetables do you eat on a usual day?                                                                                      |
|                          |     | 11-point scale ranging from never to > 10 serves                                                                                                                      | How many serves of fruit do you eat on a usual day?                                                                                           |
|                          |     | 12-point scale ranging from never to > 10 times per week                                                                                                              | On average, how many times per week do you drink soft drinks (including flavoured or mineral water)?                                          |
|                          |     | 12-point scale ranging from never to > 10 times per week                                                                                                              | In an average week, how many times would you eat something from a fast-food restaurant like McDonald's, Hungry Jacks, KFC, etc.               |
|                          |     | 11-point scale ranging from never to three or more times day                                                                                                          | How often do you eat biscuits, cakes, chocolate, lollies, ice cream or crisps?                                                                |
|                          |     | I don't eat bread<br>High fibre white bread<br>White bread<br>Wholemeal bread<br>Rye bread<br>Wholegrain or multi-grain bread<br>Gluten/wheat free bread              | What type of bread do you usually eat?                                                                                                        |
|                          |     | I do not eat rice, pasta or noodles<br>White<br>Brown/wholemeal/wholegrain<br>Gluten/wheat free                                                                       | What type of rice, pasta or noodles do you mainly choose?                                                                                     |
|                          |     | I do not consume milk<br>Full cream milk (including lactose free)<br>Reduced fat milk (including lactose free)<br>Skim milk (including lactose free)<br>Soy/rice milk | What type of milk do you mainly choose?                                                                                                       |
|                          |     | I do not eat fish<br>White (cod, hoki, whiting, etc.)<br>Oily (salmon, sardines, tuna, mackerel, trevally)                                                            | What types of fish do you usually choose to eat?                                                                                              |
|                          |     | 12-point scale ranging from never to > 10 times per week                                                                                                              | On average, how many times per week do you eat red meat?                                                                                      |
|                          |     | 12-point scale ranging from never to > 10 times per week                                                                                                              | On average, how many times per week do you eat meat products (such as sausages, frankfurter, Devon, fritz, salami, meat pies, bacon, or ham)? |
|                          |     | 5-point Likert scale ranging from never to always                                                                                                                     | How often do you add salt to your food during or after it is cooked?                                                                          |

*Note.* See Additional File 1 for measure sources. Abbreviations: PBC = perceived behavioural control.

**An Across Contexts Empirical Examination of the COM-B Model (Willmott et al., 2021)**

| <b>Sample characteristic questions</b> |                                                                                                                                                                                                                      |
|----------------------------------------|----------------------------------------------------------------------------------------------------------------------------------------------------------------------------------------------------------------------|
| <b>Sociodemographic</b>                | <b>Items</b>                                                                                                                                                                                                         |
|                                        | What is your age (in years)?                                                                                                                                                                                         |
|                                        | What is your sex?                                                                                                                                                                                                    |
|                                        | What is your highest level of education?                                                                                                                                                                             |
|                                        | What is your current employment status?                                                                                                                                                                              |
|                                        | What is your total annual household income (before tax)?                                                                                                                                                             |
|                                        | What is current relationship status?                                                                                                                                                                                 |
|                                        | Please indicate your ethnicity (i.e., your feeling of belonging and attachment to a distinct group of a larger population that shares your ancestry, colour, language, or religion) from the options provided below. |
|                                        | Please provide your residential postcode (e.g., 4001).                                                                                                                                                               |
| <b>BMI</b>                             | <b>Items</b>                                                                                                                                                                                                         |
|                                        | What is your height in centimetres (cm)?                                                                                                                                                                             |
|                                        | What is your current weight in kilograms (kg)?                                                                                                                                                                       |

*Note.* Same items used for both surveys. Abbreviations: BMI = body mass index.
