# Supplementary material for: Capability, opportunity, and motivation: an across contexts empirical examination of the COM-B model
Source: PubMed Central journal article supplement (PMC8164288; doi:10.1186/s12889-021-11019-w), 2021-05-29
Supplement: 12889_2021_11019_MOESM4_ESM.pdf [file 12889_2021_11019_MOESM4_ESM.pdf]

**Additional File 4**

*Physical activity measurement model*

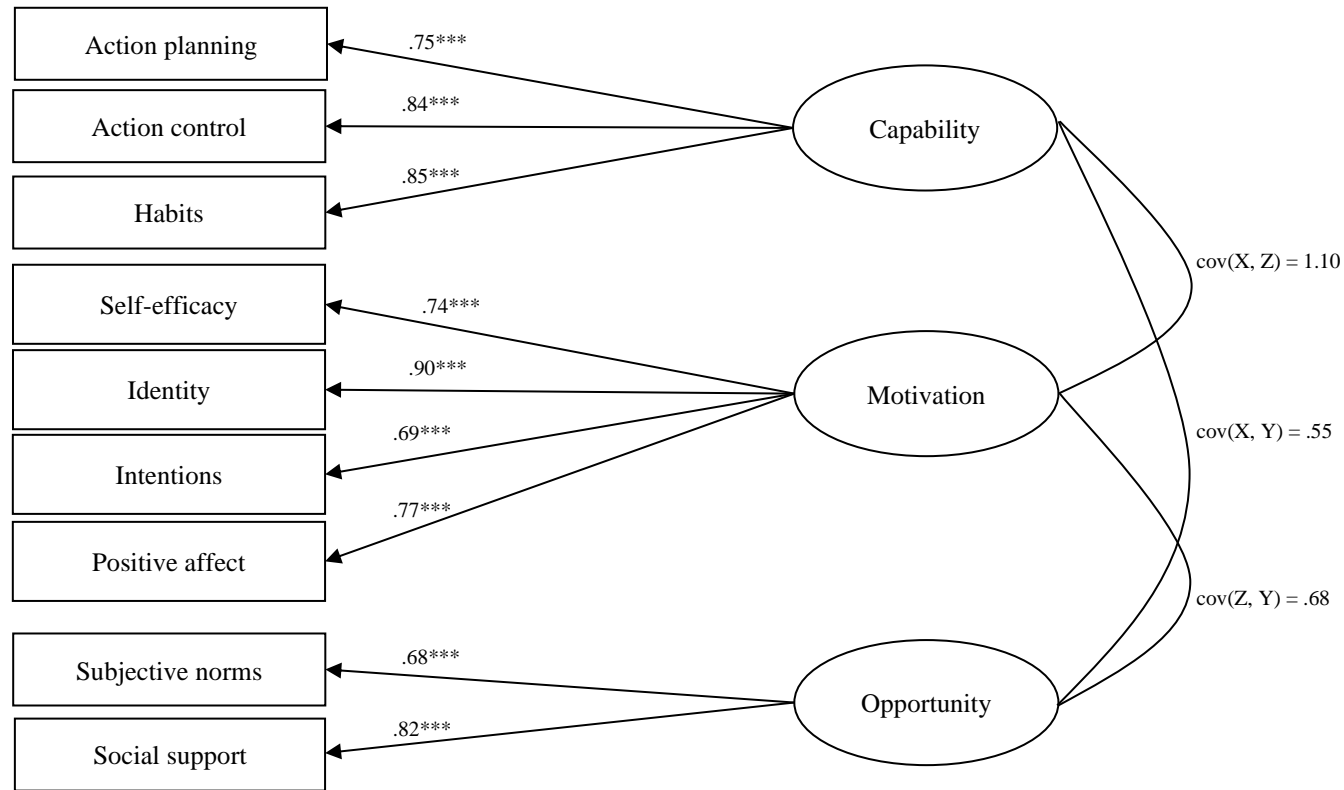

*Note.* Trimmed measurement model (N = 582). Model fit: CMIN/DF = 1.361; GFI = .989, AGFI = .977; CFI = .998; TLI = .996; RMSEA = .025; SRMR = .014. Significance levels: \*p < .05, \*\*p < .01, \*\*\*p < .001.
