# Supplementary material for: Capability, opportunity, and motivation: an across contexts empirical examination of the COM-B model
Source: PubMed Central journal article supplement (PMC8164288; doi:10.1186/s12889-021-11019-w), 2021-05-29
Supplement: 12889_2021_11019_MOESM5_ESM.pdf [file 12889_2021_11019_MOESM5_ESM.pdf]

**Additional File 5**

*Eating measurement model*

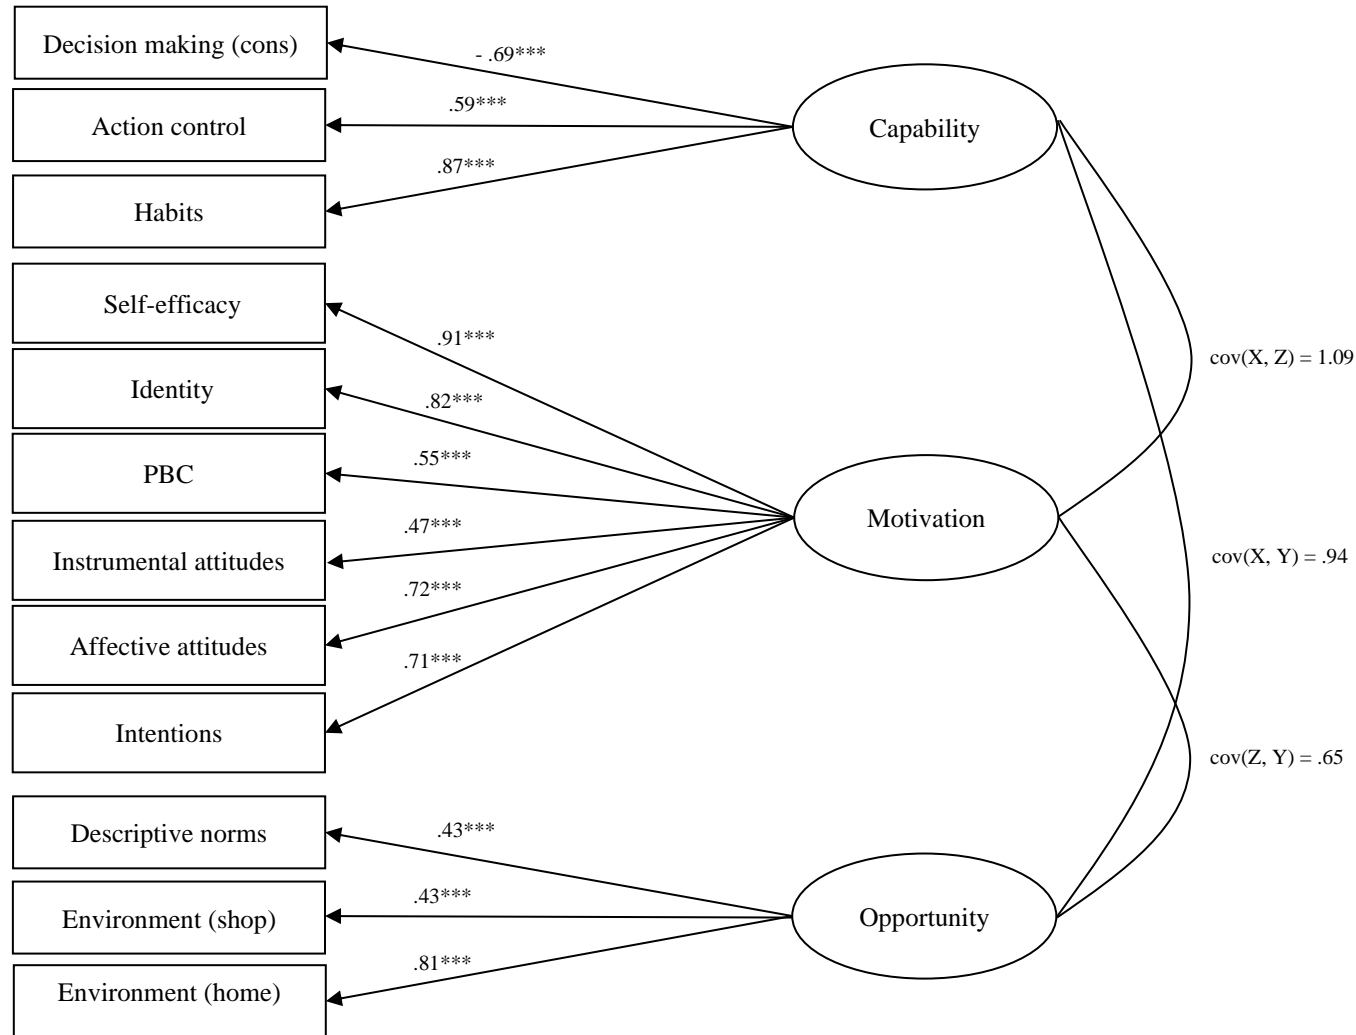

Note. Trimmed model (N = 455). Model fit: CMIN/DF = 1.957; GFI = .974, AGFI = .945; CFI = .987; TLI = .976; RMSEA = .046; SRMR = .026. Significance levels: \*p < .05, \*\*p < .01, \*\*\*p < .001.
